# Supplementary material for: In Silico Design of Dual-Binding Site Anti-Cholinesterase Phytochemical Heterodimers as Treatment Options for Alzheimer’s Disease
Source: MDPI journal article supplement (doi:10.3390/cimb44010012), 2021-12-29
Supplement: s1 [file s1]

**Table S1.** List of Phytochemicals retrieved from Dr. Duke's Phytochemical and Ethnobotanical databases [39] with reported anti-acetylcholinesterase activity.

| Phytochemical |                        | Phytochemical |                     |
|---------------|------------------------|---------------|---------------------|
| 1             | (-)-Borneol            | 22            | $\gamma$ -Terpinene |
| 2             | (-)-Menthol            | 23            | Huperzine-A         |
| 3             | (-)-Menthone           | 24            | Isomenthol          |
| 4             | (-)-Piperitone         | 25            | Isomenthone         |
| 5             | (-)-Terpinen-4-Ol      | 26            | Isopulegol          |
| 6             | (+)-Menthol            | 27            | L-Carvone           |
| 7             | (+)-Piperitenone-Oxide | 28            | Limonene            |
| 8             | (+)-Pulegone           | 29            | Linalool            |
| 9             | (+)-Terpinen-4-Ol      | 30            | L-Limonene          |
| 10            | 1,8-Cineole            | 31            | L-Menthol           |
| 11            | Akuammicine            | 32            | Menthol             |
| 12            | Akuammidine            | 33            | Menthone            |
| 13            | $\alpha$ -Terpinene    | 34            | Naringenin          |
| 14            | Berberastine           | 35            | P-Cymene            |
| 15            | Berberine              | 36            | Piperitenone        |
| 16            | Carvone                | 37            | Pulegone            |
| 17            | Chelerythrine          | 38            | Sanguinarine        |
| 18            | D-Carvone              | 39            | Terpinen-4-Ol       |
| 19            | D-Limonene             | 40            | Viridiflorol        |
| 20            | Elemol                 | 41            | Yohimbine           |
| 21            | Galantamine            |               |                     |
